# Supplementary material for: Sichuan hot-spring snakes imperiled: reason, situation, and protection
Source: PubMed Central journal article supplement — Zool Res. 2022 Jan 18;43(1):95–7. doi: 10.24272/j.issn.2095-8137.2021.321 (PMC8743253; doi:10.24272/j.issn.2095-8137.2021.321), 2022-01-18
Supplement: zr-43-1-95-S1.pdf [file zr-43-1-95-S1.pdf]

## Supplementary Materials

### Supplementary Methods

#### Population genomic analysis

Samples used for genome re-sequencing were collected from seven Sichuan hot-spring snakes (*T. zhaoermii*) in 2014–2019. A short paired-end insert library (300–500 bp) was constructed using standard protocols provided by Illumina, and whole-genome sequencing was employed using the NovaSeq 6000 system to produce 15-fold coverage of the hot-spring snake genome (~1.76 Gb). All raw data were submitted to the Genome Sequence Archive (<https://ngdc.cnbc.ac.cn>) in the China National GeneBank Database (CNCBdb) under Bioproject accession No. PRJCA007353. The raw data were filtered by removing adaptor sequences, polymerase chain reaction (PCR) duplicates, and low-quality reads using Trimmomatic (v.0.32) (Bolger et al., 2014). Clean reads were then mapped to the genome of *Thermophis baileyi* (assembly DSBC\_Tbai\_1.0) using BWA-MEM (v.0.7.17) (Li and Durbin, 2009) with default parameters. SAMtools (v.0.1.18) was used for sorting and removing PCR duplicates (Li, 2011; Li et al., 2009). To minimize false-positive SNP calls around indels, local realignment around indels was performed using the Genome Analysis Tool Kit (v4.0.11) (Brouard et al., 2019). The whole-genome diploid consensus sequence of one individual was generated by bcftools (v.1.9) (Li, 2011). The results were then used in the PSMC model (Li and Durbin, 2011) with the following parameters: -N25 -t15 -r5 -b -p “4+25 \* 2+4+6”. One hundred bootstraps were performed to assess variation in the inferred effective population size ( $N_e$ ) trajectories. Generation time and neutral mutation rate were set to 3 years and 5e-09, and were used to convert population sizes and scale time into real sizes and time (Li et al., 2018).

The vcf files were extracted from previous bam files with bcftools (Li, 2011) and filtered using vcftools (v0.1.17) with the parameter “--maf 0.1 --max-missing 0.75 --minQ 30 --minDP 4”.

Average theta pi was calculated using vcftools (v0.1.17) (Danecek et al., 2011) with the sliding windows method. Window size was set to 1 000 bp. Theta w (Watterson estimator) was calculated based on the formula:

$$\frac{S}{L * \sum_{i=1}^{2n-1} 1/n}$$

Where S is the variable site in a window, L is the window size, and n is the sample size. Recent demographic history was inferred using genetic optimization for  $N_e$  estimation (GONE) (Santiago et al., 2020).

## REFERENCES

- Bolger AM, Lohse M, Usadel B. 2014. Trimmomatic: a flexible trimmer for Illumina sequence data. *Bioinformatics*, **30**(15): 2114–2120.
- Brouard JS, Schenkel F, Marete A, Bissonnette N, 2019. The GATK joint genotyping workflow is appropriate for calling variants in RNA-seq experiments. *Journal of Animal Science and Biotechnology*, **10**: 44.
- Danecek P, Auton A, Abecasis G, Albers CA, Banks E, DePristo MA, et al. 2011. The

- variant call format and VCFtools. *Bioinformatics*, **27**(15): 2156–2158.
- Li H. 2011. A statistical framework for SNP calling, mutation discovery, association mapping and population genetical parameter estimation from sequencing data. *Bioinformatics*, **27**(21): 2987–2993.
- Li H, Durbin R. 2009. Fast and accurate short read alignment with Burrows-Wheeler transform. *Bioinformatics*, **25**(14): 1754–1760.
- Li H, Durbin R. 2011. Inference of human population history from individual whole-genome sequences. *Nature*, **475**(7357): 493–496.
- Li H, Handsaker B, Wysoker A, Fennell T, Ruan J, Homer N, et al. 2009. The sequence alignment/Map format and SAMtools. *Bioinformatics*, **25**(16): 2078–2079.
- Li JT, Gao YD, Xie L, Deng C, Shi P, Guan ML et al., 2018. Comparative genomic investigation of high-elevation adaptation in ectothermic snakes. *Proceedings of the National Academy of Sciences of the United States of America*, **115**(33): 8406–8411.
- Santiago E, Novo I, Pardiñas AF, Saura M, Wang JL, Caballero A. 2020. Recent demographic history inferred by high-resolution analysis of linkage disequilibrium. *Molecular Biology and Evolution*, **37**(12): 3642–3653.

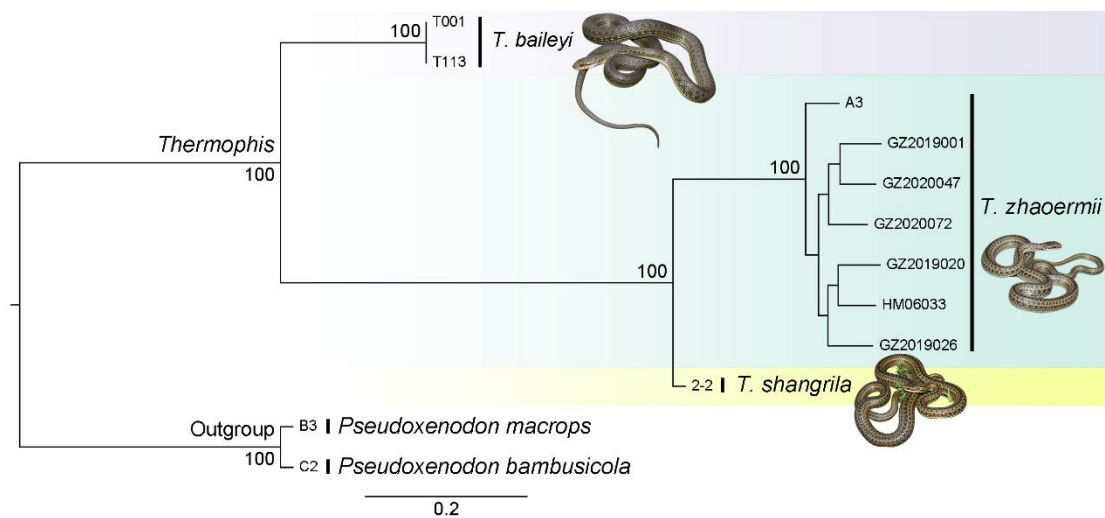

**Supplementary Figure S1. Maximum-likelihood (ML) phylogenetic tree estimated from genome-level SNP data, depicting phylogenetic relationships of *Thermophis* members.** Photographs by Jin-Long Ren.

**Supplementary Table S1. Sample locations and SNP genetic diversity of *T. zhaoermii* used in this study.**

| Sample ID   | locality               | homogenous sites | heterogenous sites | heterogenous ratio ( $\times 10^{-3}$ ) | $\theta\pi$ ( $\times 10^{-3}$ ) | $\theta\omega$ ( $\times 10^{-3}$ ) | Tv/Ts  | SNPden |
|-------------|------------------------|------------------|--------------------|-----------------------------------------|----------------------------------|-------------------------------------|--------|--------|
| A3          | Litang, Sichuan        | 1 544 048 253    | 2 610 502          | 1.68                                    | 2.20                             | 2.20                                | 2.3987 | 6.4735 |
| GZ2019001   | Xinlong, Sichuan       | 1 493 376 298    | 2 626 129          | 1.75                                    | 2.37                             | 2.37                                | 2.4820 | 6.2464 |
| GZ2019020   | Xiangcheng, Sichuan    | 1 493 013 655    | 2 549 347          | 1.70                                    | 2.32                             | 2.32                                | 2.4633 | 6.2346 |
| GZ2019026   | Litang, Sichuan        | 1 525 201 927    | 2 679 594          | 1.75                                    | 2.41                             | 2.41                                | 2.4369 | 6.2795 |
| GZ2020047   | Baiyu, Sichuan         | 1 544 543 587    | 2 535 022          | 1.66                                    | 2.30                             | 2.30                                | 2.4424 | 6.4375 |
| GZ2020072   | Batang, Sichuan        | 1 541 379 964    | 2 573 145          | 2.08                                    | 2.34                             | 2.34                                | 2.4199 | 6.3906 |
| HM06033     | Litang, Sichuan        | 1 539 142 567    | 3 216 802          | 1.63                                    | 2.69                             | 2.69                                | 2.4344 | 6.3641 |
| All samples | western Sichuan, China | 1 525 815 179    | 2 684 363          | 1.75                                    | 1.91                             | 1.95                                | 2.4682 | 8.7802 |

**Supplementary Table S2. Information on samples used in phylogenetic analysis.**

| Species                          | Sample ID | Locality            | Source            |
|----------------------------------|-----------|---------------------|-------------------|
| <i>T. zhaoermii</i>              | A3        | Litang, Sichuan     | Li et al., (2018) |
| <i>T. zhaoermii</i>              | GZ2019001 | Xinlong, Sichuan    | This study        |
| <i>T. zhaoermii</i>              | GZ2019020 | Xiangcheng, Sichuan | This study        |
| <i>T. zhaoermii</i>              | GZ2019026 | Litang, Sichuan     | This study        |
| <i>T. zhaoermii</i>              | GZ2020047 | Baiyu, Sichuan      | This study        |
| <i>T. zhaoermii</i>              | GZ2020072 | Batang, Sichuan     | This study        |
| <i>T. zhaoermii</i>              | HM06033   | Litang, Sichuan     | Li et al., (2018) |
| <i>T. baileyi</i>                | 1hao      | Xizang              | Li et al., (2018) |
| <i>T. baileyi</i>                | 1-13      | Xizang              | Li et al., (2018) |
| <i>T. shangrila</i>              | 2-2       | Shangri-La, Yunnan  | Li et al., (2018) |
| <i>Pseudoxenodon macrops</i>     | B3        | -                   | Li et al., (2018) |
| <i>Pseudoxenodon bambusicola</i> | C2        | -                   | Li et al., (2018) |
